# Supplementary material
Source: MDPI journal article supplement (https://www.mdpi.com/2071-1050/14/10/6322)
Supplement: s1 [file s1]

**Table S1.** Species list and ecological data of plants found in permanent plot in tidal forest at Rayong Botanical Garden, Rayong province, Thailand.

| <b>Botanical Name</b>                                                     | <b>Family</b>    | <b>Origin</b> | <b>No. Individual</b> | <b>Frequency</b> | <b>Re.D en</b> | <b>Re.F re</b> | <b>Re. Do</b> | <b>Important</b> |
|---------------------------------------------------------------------------|------------------|---------------|-----------------------|------------------|----------------|----------------|---------------|------------------|
| <i>Melaleuca cajuputi</i> Powell subsp. <i>cumingiana</i> (Turcz.) Barlow | Myrtaceae        | Na            | 410                   | 73               | 35.31          | 25.80          | 48.66         | 109.77           |
| <i>Peltophorum dasyrrhachis</i> (Miq.) Kurz                               | Fabaceae         | Na            | 355                   | 46               | 30.58          | 16.25          | 18.42         | 65.25            |
| <i>Carallia brachiata</i> (Lour.) Merr.                                   | Rhizophoraceae   | Na            | 93                    | 36               | 8.01           | 12.72          | 5.96          | 26.69            |
| <i>Cratoxylum cochinchinense</i> (Lour.) Blume                            | Hypericaceae     | Na            | 130                   | 30               | 11.20          | 10.60          | 4.31          | 26.10            |
| <i>Careya arborea</i> Roxb.                                               | Lecythidaceae    | Na            | 23                    | 17               | 1.98           | 6.01           | 10.04         | 18.03            |
| <i>Acacia auriculiformis</i> A.Cunn. ex Benth.                            | Fabaceae         | Ex            | 24                    | 16               | 2.07           | 5.65           | 2.29          | 10.01            |
| <i>Vitex quinata</i> (Lour.) F.N.Williams                                 | Lamiaceae        | Na            | 28                    | 11               | 2.41           | 3.89           | 1.23          | 7.53             |
| <i>Mangifera caloneura</i> Kurz                                           | Anacardiaceae    | Na            | 17                    | 7                | 1.46           | 2.47           | 2.99          | 6.93             |
| <i>Memecylon pauciflorum</i> Blume                                        | Melastomataceae  | Na            | 22                    | 8                | 1.89           | 2.83           | 0.53          | 5.25             |
| <i>Artocarpus lacucha</i> Roxb. ex Buch.-Ham.                             | Moraceae         | Na            | 11                    | 8                | 0.95           | 2.83           | 0.62          | 4.40             |
| <i>Antidesma ghaesembilla</i> Gaertn.                                     | Phyllanthaceae   | Na            | 12                    | 6                | 1.03           | 2.12           | 0.59          | 3.74             |
| <i>Parinari anamensis</i> Hance                                           | Chrysobalanaceae | Na            | 5                     | 3                | 0.43           | 1.06           | 1.84          | 3.33             |
| <i>Shorea roxburghii</i> G.Don                                            | Dipterocarpaceae | Na            | 7                     | 3                | 0.60           | 1.06           | 1.51          | 3.18             |
| <i>Casearia grewiifolia</i>                                               | Salicaceae       | Na            | 8                     | 6                | 0.69           | 2.12           | 0.20          | 3.01             |

| Vent.                                                       |               |    |   |   |      |      |      |      |
|-------------------------------------------------------------|---------------|----|---|---|------|------|------|------|
| <i>Glochidion eriocarpum</i> Champ.                         | Euphorbiaceae | Na | 2 | 2 | 0.17 | 0.71 | 0.07 | 0.95 |
| <i>Suregada multiflora</i> (A.Juss.) Baill.                 | Euphorbiaceae | Na | 2 | 2 | 0.17 | 0.71 | 0.04 | 0.92 |
| UNKNOWN-1                                                   | Bignoniaceae  | Na | 2 | 2 | 0.17 | 0.71 | 0.03 | 0.91 |
| UNKNOWN-2                                                   | Lauraceae     | Na | 2 | 1 | 0.17 | 0.35 | 0.19 | 0.71 |
| <i>Terminalia</i> sp.                                       | Combretaceae  | Na | 2 | 1 | 0.17 | 0.35 | 0.12 | 0.65 |
| <i>Litsea glutinosa</i> (Lour.) C.B.Rob.                    | Lauraceae     | Na | 2 | 1 | 0.17 | 0.35 | 0.09 | 0.62 |
| <i>Catunaregam tomentosa</i> (Blume ex DC.) Tirveng.        | Rubiaceae     | Na | 1 | 1 | 0.09 | 0.35 | 0.14 | 0.58 |
| <i>Choerospondias axillaris</i> (Roxb.) B.L.Burt & A.W.Hill | Anacardiaceae | Na | 1 | 1 | 0.09 | 0.35 | 0.08 | 0.52 |
| <i>Acacia mangium</i> Willd.                                | Fabaceae      | Ex | 1 | 1 | 0.09 | 0.35 | 0.03 | 0.47 |
| UNKNOWN-3                                                   | UNKNOWN       | Na | 1 | 1 | 0.09 | 0.35 | 0.02 | 0.46 |
